# Supplementary material
Source: PubMed Central journal article supplement (PMC2788667)
Supplement: NIHMS135269-supplement-1_si_001.pdf [file NIHMS135269-supplement-1_si_001.pdf]

# Preclinical Efficacy of a Carboxylesterase 2- Activated Prodrug of Doxazolidine, Pentyl PABC- Doxaz

Benjamin L. Barthel,<sup>1</sup> Zhiyong Zhang,<sup>2</sup> Daniel L. Rudnicki,<sup>1</sup> Christopher D. Coldren,<sup>3</sup>  
Margaret Polinkovsky,<sup>4</sup> Hengrui Sun,<sup>4</sup> Gary G. Koch,<sup>4</sup> Daniel C.F. Chan,<sup>2</sup> and Tad H.  
Koch<sup>1\*</sup>

<sup>1</sup>Department of Chemistry and Biochemistry, University of Colorado, Boulder, CO  
80309; <sup>2</sup>Department of Medical Oncology, University of Colorado Denver Health

Sciences Center, Aurora, CO 80045; <sup>3</sup>Division of Pulmonary Sciences and Critical Care  
Medicine, University of Colorado Denver Health Sciences Center, Aurora, CO 80045;

<sup>4</sup>Biometric Consulting Laboratory, Gillings School of Global Public Health, University of  
North Carolina, Chapel Hill, NC 27599.

\*Corresponding author: phone 303-492-6193, fax 303-492-5894, email

tad.koch@colorado.edu

## **Supporting Information**

Statistical Analysis of Inhibition of H1435 Tumor Growth  
Cell Growth Data – Doxaz  
Cell Growth Data – Pentyl PABC-Doxaz  
Statistical Analysis of Cell Data

Table of mean difference in growth of H1435 tumors and p value for each treatment comparison at different time intervals.

|                         | Day 14 to 77         |                   |         | Day 14 to 28         |                   |         | Day 14 to 35         |                   |         |
|-------------------------|----------------------|-------------------|---------|----------------------|-------------------|---------|----------------------|-------------------|---------|
|                         | Mean**<br>Difference | Standard<br>Error | P-value | Mean**<br>Difference | Standard<br>Error | P-value | Mean**<br>Difference | Standard<br>Error | P-value |
| <b>PPD4 vs. PPD3</b>    | -0.32                | 0.47              | 0.4937  | -1.10                | 0.32              | 0.0017* | -0.91                | 0.33              | 0.0097* |
| <b>PPD4 vs. Dox</b>     | -0.68                | 0.44              | 0.1307  | -1.59                | 0.30              | <.0001* | -1.30                | 0.31              | 0.0002* |
| <b>PPD4 vs. Control</b> | -1.99                | 0.44              | <.0001* | -1.51                | 0.30              | <.0001* | -1.57                | 0.31              | <.0001* |
| <b>PPD3 vs. Dox</b>     | -0.35                | 0.45              | 0.4367  | -0.49                | 0.31              | 0.1188  | -0.39                | 0.32              | 0.2231  |
| <b>PPD3 vs. Control</b> | -1.67                | 0.44              | 0.0006* | -0.41                | 0.31              | 0.1899  | -0.66                | 0.31              | 0.0432  |
| <b>Dox vs. Control</b>  | -1.31                | 0.43              | 0.0045* | 0.09                 | 0.30              | 0.7766  | -0.27                | 0.31              | 0.3932  |

  

|                         | Day 35 to 56         |                   |         | Day 63 to 77         |                   |         | Day 63 to 77 vs. Day 14 to 28 |                   |         |
|-------------------------|----------------------|-------------------|---------|----------------------|-------------------|---------|-------------------------------|-------------------|---------|
|                         | Mean**<br>Difference | Standard<br>Error | P-value | Mean**<br>Difference | Standard<br>Error | P-value | Mean**<br>Difference          | Standard<br>Error | P-value |
| <b>PPD4 vs. PPD3</b>    | -0.49                | 0.52              | 0.3540  | 0.68                 | 0.65              | 0.3008  | 1.78                          | 0.50              | 0.0012* |
| <b>PPD4 vs. Dox</b>     | -0.56                | 0.49              | 0.2582  | 0.09                 | 0.60              | 0.8804  | 1.69                          | 0.47              | 0.0010* |
| <b>PPD4 vs. Control</b> | -2.08                | 0.49              | 0.0002* | -2.35                | 0.61              | 0.0004* | -0.84                         | 0.47              | 0.0831  |
| <b>PPD3 vs. Dox</b>     | -0.07                | 0.50              | 0.8897  | -0.59                | 0.62              | 0.3491  | -0.09                         | 0.48              | 0.8503  |
| <b>PPD3 vs. Control</b> | -1.58                | 0.50              | 0.0030* | -3.03                | 0.61              | <.0001* | -2.62                         | 0.48              | <.0001* |
| <b>Dox vs. Control</b>  | -1.51                | 0.49              | 0.0036* | -2.45                | 0.60              | 0.0002* | -2.53                         | 0.47              | <.0001* |

\* Significant difference with Bonferroni-Holm correction (i.e.,  $0.05/6=0.0083$  for smallest p-value,  $0.05/5=0.01$  for second smallest p-value,  $0.05/4=0.0125$  for third smallest p-value, etc, sequentially).

\*\*Adjusted mean, after adjusting day 7 as covariate throughout the model. The difference is computed as the first treatment minus the second treatment in the pairwise comparison.

Table of Cell Growth Data for NCI Treatments with Doxaz

| Cell Line       | Trial 1 |                        |      |      |      |      | Trial 2 |                        |      |      |      |      |
|-----------------|---------|------------------------|------|------|------|------|---------|------------------------|------|------|------|------|
|                 | Veh     | Concentrations (log M) |      |      |      |      | Veh     | Concentrations (log M) |      |      |      |      |
|                 |         | -10                    | -9   | -8   | -7   | -6   |         | -10                    | -9   | -8   | -7   | -6   |
| CCRF-CEM        | 1.13    | 0.91                   | 0.7  | 0.44 | 0.25 | 0.2  | 0.8     | 0.54                   | 0.48 | 0.27 | 0.17 | 0.15 |
| HL-60(TB)       | 1.1     | 0.94                   | 0.61 | 0.34 | 0.21 | 0.18 | 1.19    | 0.78                   | 0.62 | 0.3  | 0.21 | 0.2  |
| K-562           | 1.4     | 1.36                   | 1.19 | 0.74 | 0.22 | 0.18 | 1.12    | 0.91                   | 0.8  | 0.39 | 0.14 | 0.12 |
| MOLT-4          | 1.08    | 0.83                   | 0.58 | 0.3  | 0.24 | 0.18 | 1.39    | 0.93                   | 0.76 | 0.41 | 0.3  | 0.27 |
| RPMI-8226       | 0.46    | 0.42                   | 0.36 | 0.2  | 0.15 | 0.11 | 1       | 0.88                   | 0.82 | 0.38 | 0.21 | 0.21 |
| SR              | 0.4     | 0.4                    | 0.26 | 0.14 | 0.12 | 0.08 | 0.61    | 0.43                   | 0.36 | 0.19 | 0.15 | 0.13 |
| A549-ATCC       | 1.55    | 1.43                   | 1.31 | 1.02 | 0.42 | 0.4  | 0.76    | 0.67                   | 0.62 | 0.37 | 0.19 | 0.2  |
| EKVX            | 1.84    | 1.86                   | 1.8  | 1.84 | 1    | 0.76 | 1.31    | 1.26                   | 1.31 | 1.27 | 0.45 | 0.5  |
| HOP-62          | 1.53    | 1.42                   | 1.29 | 0.92 | 0.62 | 0.44 | 1.11    | 1.15                   | 1.08 | 0.77 | 0.44 | 0.31 |
| HOP-92          | 1.03    | 0.99                   | 0.93 | 0.8  | 0.58 | 0.47 | 1.01    | 0.88                   | 0.85 | 0.65 | 0.47 | 0.43 |
| NCI-H226        | 0.99    | 0.97                   | 0.98 | 0.75 | 0.39 | 0.25 | 2.05    | 1.84                   | 1.76 | 1.47 | 0.8  | 0.59 |
| NCI-H23         | 1.61    | 1.55                   | 1.37 | 0.96 | 0.34 | 0.25 | 1.37    | 1.28                   | 1.17 | 0.71 | 0.2  | 0.19 |
| NCI-H322M       | 1.31    | 1.34                   | 1.28 | 1.23 | 0.62 | 0.49 | 0.96    | 0.95                   | 1.01 | 0.93 | 0.53 | 0.52 |
| NCI-H460        | 0.67    | 0.5                    | 0.3  | 0.19 | 0.09 | 0.05 | 1.42    | 0.71                   | 0.55 | 0.29 | 0.19 | 0.12 |
| NCI-H522        | 1.79    | 1.67                   | 1.63 | 1.38 | 0.5  | 0.36 | 0.87    | 0.81                   | 0.84 | 0.51 | 0.26 | 0.27 |
| COLO-205        | 0.71    | 0.68                   | 0.7  | 0.51 | 0.07 | 0.04 | 0.55    | 0.44                   | 0.5  | 0.36 | 0.04 | 0.06 |
| HCC-2998        | 1.28    | 1.29                   | 1.26 | 1.06 | 0.35 | 0.11 | 0.94    | 0.8                    | 0.77 | 0.67 | 0.17 | 0.04 |
| HCT-116         | 1.38    | 1.3                    | 1.14 | 0.82 | 0.26 | 0.21 | 0.99    | 0.88                   | 0.75 | 0.32 | 0.15 | 0.12 |
| HCT-15          | 2.47    | 2.13                   | 2.24 | 1.97 | 0.96 | 0.51 | 0.66    | 0.68                   | 0.6  | 0.49 | 0.11 | 0.09 |
| HT29            | 0.42    | 0.42                   | 0.32 | 0.23 | 0.07 | 0.05 |         |                        |      |      |      |      |
| KM12            | 1.12    | 1.07                   | 0.98 | 0.86 | 0.31 | 0.25 | 0.99    | 0.89                   | 0.98 | 0.74 | 0.34 | 0.34 |
| SW-620          | 1.45    | 1.33                   | 1.14 | 0.82 | 0.37 | 0.31 | 1.11    | 0.87                   | 0.83 | 0.51 | 0.21 | 0.22 |
| SF-268          | 0.52    | 0.52                   | 0.44 | 0.3  | 0.17 | 0.15 | 0.98    | 0.8                    | 0.7  | 0.41 | 0.27 | 0.24 |
| SF-295          | 0.88    | 0.85                   | 0.74 | 0.54 | 0.31 | 0.26 | 0.85    | 0.78                   | 0.83 | 0.47 | 0.37 | 0.4  |
| SF-539          | 1.93    | 1.96                   | 1.93 | 1.26 | 0.52 | 0.36 | 2.37    | 2.25                   | 2.4  | 1.74 | 0.75 | 0.61 |
| SNB-19          | 0.83    | 0.54                   | 0.76 | 0.52 | 0.29 | 0.24 | 1.32    | 1.12                   | 1.15 | 0.76 | 0.43 | 0.5  |
| SNB-75          | 0.98    | 0.98                   | 0.95 | 0.82 | 0.21 | 0.12 | 1.06    | 0.99                   | 1.01 | 0.78 | 0.14 | 0.11 |
| U251            | 1.35    | 1.25                   | 1.04 | 0.71 | 0.32 | 0.25 | 0.42    | 0.35                   | 0.31 | 0.14 | 0.09 | 0.08 |
| LOX-IMVI        | 1.96    | 1.65                   | 1.48 | 0.9  | 0.43 | 0.3  | 0.89    | 0.68                   | 0.57 | 0.18 | 0.12 | 0.08 |
| MALME-3M        | 0.95    | 1.03                   | 0.98 | 0.9  | 0.31 | 0.25 | 0.86    | 0.82                   | 0.89 | 0.78 | 0.38 | 0.43 |
| M14             | 1.36    | 1.33                   | 1.19 | 0.85 | 0.34 | 0.06 | 1.26    | 1.2                    | 1.12 | 0.69 | 0.19 | 0.05 |
| MDA-MB-435      | 1.16    | 1.14                   | 1    | 0.86 | 0.25 | 0.09 | 1.48    | 1.52                   | 1.53 | 1.16 | 0.31 | 0.24 |
| SK-MEL-2        | 1.98    | 2.06                   | 2.07 | 1.96 | 0.43 | 0.33 | 1.29    | 1.27                   | 1.38 | 0.9  | 0.29 | 0.31 |
| SK-MEL-28       | 1.09    | 1.11                   | 1.07 | 1.01 | 0.26 | 0.14 | 1.98    | 1.96                   | 2.02 | 1.72 | 0.47 | 0.26 |
| SK-MEL-5        | 2.13    | 2.1                    | 1.93 | 1.47 | 0.37 | 0.29 | 2.78    | 2.72                   | 2.83 | 2.19 | 0.44 | 0.21 |
| UACC-257        | 1.37    | 1.36                   | 1.38 | 1.3  | 0.52 | 0.47 | 0.74    | 0.66                   | 0.67 | 0.55 | 0.19 | 0.21 |
| UACC-62         |         |                        |      |      |      |      | 1.72    | 1.6                    | 1.51 | 0.87 | 0.12 | 0.11 |
| IGROVI          | 1.66    | 1.48                   | 1.38 | 1    | 0.33 | 0.66 | 0.86    | 0.6                    | 0.57 | 0.43 | 0.28 | 0.31 |
| OVCAR-3         | 0.83    | 0.86                   | 0.83 | 0.66 | 0.29 | 0.29 | 1.21    | 1.29                   | 1.22 | 1.02 | 0.52 | 0.56 |
| OVCAR-4         | 0.81    | 0.84                   | 0.83 | 0.78 | 0.43 | 0.36 |         |                        |      |      |      |      |
| OVCAR-5         | 0.83    | 0.85                   | 0.83 | 0.76 | 0.38 | 0.36 | 0.8     | 0.83                   | 0.82 | 0.79 | 0.42 | 0.45 |
| OVCAR-8         | 1.13    | 1.05                   | 0.99 | 0.79 | 0.35 | 0.3  | 0.64    | 0.52                   | 0.55 | 0.35 | 0.22 | 0.18 |
| NCI/ADR-RES     | 1.75    | 1.69                   | 1.64 | 1.46 | 0.69 | 0.54 | 1.52    | 1.46                   | 1.43 | 1.15 | 0.52 | 0.41 |
| SK-OV-3         | 0.9     | 1.07                   | 0.91 | 0.83 | 0.48 | 0.47 | 1.05    | 1.03                   | 1.09 | 0.79 | 0.61 | 0.57 |
| 786-0           |         |                        |      |      |      |      | 2.41    | 2.35                   | 2.19 | 0.85 | 0.78 | 0.67 |
| A498            | 1.59    | 1.51                   | 1.49 | 1.35 | 0.71 | 0.54 | 1.76    | 1.71                   | 1.75 | 1.61 | 0.68 | 0.5  |
| ACHN            | 1.22    | 1.1                    | 0.89 | 0.52 | 0.3  | 0.23 | 0.56    | 0.47                   | 0.41 | 0.2  | 0.12 | 0.12 |
| CAKI-1          | 1.14    | 1.07                   | 0.86 | 0.45 | 0.33 | 0.29 | 1.47    | 1.22                   | 1.18 | 0.84 | 0.45 | 0.5  |
| RXF             | 0.32    | 0.91                   | 0.86 | 0.8  | 0.61 | 0.15 | 0.73    | 0.63                   | 0.63 | 0.43 | 0.21 | 0.2  |
| SN12C           | 0.84    | 0.87                   | 0.83 | 0.61 | 0.41 | 0.28 | 1.9     | 1.73                   | 1.64 | 1.35 | 0.73 | 0.63 |
| TK-10           | 1.3     | 1.33                   | 1.24 | 1.18 | 0.58 | 0.53 | 1.1     | 1.04                   | 1.14 | 0.99 | 0.61 | 0.63 |
| UO-31           | 1       | 0.9                    | 0.82 | 0.6  | 0.27 | 0.27 | 1.13    | 1.07                   | 1.06 | 0.84 | 0.43 | 0.52 |
| PC-3            |         |                        |      |      |      |      | 1.39    | 1.33                   | 1.25 | 0.88 | 0.34 | 0.2  |
| DU-145          | 0.86    | 0.83                   | 0.68 | 0.33 | 0.26 | 0.23 | 1.24    | 1.11                   | 1.1  | 0.49 | 0.38 | 0.42 |
| MCF-7           | 0.69    | 0.64                   | 0.54 | 0.36 | 0.22 | 0.17 | 0.65    | 0.55                   | 0.49 | 0.27 | 0.19 | 0.13 |
| MDA-MB-231/ATCC | 0.48    | 0.49                   | 0.46 | 0.4  | 0.24 | 0.14 | 0.66    | 0.64                   | 0.64 | 0.55 | 0.27 | 0.21 |
| HS5787T         | 1.22    | 1.27                   | 1.21 | 1.16 | 0.73 | 0.63 | 1.16    | 1.15                   | 1.19 | 1.03 | 0.62 | 0.58 |
| BT-549          | 1.91    | 1.92                   | 1.83 | 1.64 | 0.79 | 0.61 | 1.29    | 1.2                    | 1.27 | 1    | 0.06 | 0.6  |
| T-47D           | 1       | 1.08                   | 0.92 | 0.66 | 0.41 | 0.38 | 0.9     | 0.74                   | 0.74 | 0.53 | 0.37 | 0.39 |

Table of Cell Growth Data for NCI Treatments with pentyl PABC-Doxaz

| Cell Line       | Trial 1                |      |     |      |      |     | Trial 2                |     |      |      |      |      |
|-----------------|------------------------|------|-----|------|------|-----|------------------------|-----|------|------|------|------|
|                 | Concentrations (log M) |      |     |      |      |     | Concentrations (log M) |     |      |      |      |      |
|                 | Veh                    | -10  | -9  | -8   | -7   | -6  | Veh                    | 10  | -9   | -8   | -7   | -6   |
| CCRF-CEM        | 1.49                   | 1.53 | 1.5 | 1.36 | 1.07 | 0.3 | 1.17                   | 1.5 | 1.09 | 0.63 | 0.66 | 0.81 |
| HL-60(TB)       | 1.95                   | 2.03 | 2   | 1.5  | 1.1  | 0.4 | 0.8                    | 0.8 | 0.65 | 0.44 | 0.39 | 0.09 |
| K-562           | 0.5                    | 0.51 | 0.5 | 0.44 | 0.31 | -0  | 1.05                   | 0.8 | 0.81 | 0.67 | 0.45 | 0.08 |
| MOLT-4          | 1.66                   | 1.49 | 1.4 | 1.4  | 0.84 | 0.3 | 1.01                   | 0.9 | 0.73 | 0.53 | 0.27 | 0.12 |
| RPMI-8226       | 2.23                   | 2.29 | 2.1 | 1.83 | 1.64 | 0.5 | 1.78                   | 1.8 | 1.5  | 1.33 | 1.39 | 0.63 |
| SR              | 1.32                   | 1.32 | 1.2 | 0.9  | 0.6  | 0.2 | 0.83                   | 0.8 | 0.64 | 0.36 | 0.21 | 0.05 |
| A549/ATCC       | 1.96                   | 1.89 | 1.6 | 1.3  | 1.12 | 0.5 | 1.55                   | 1.4 | 1.12 | 0.97 | 0.76 | 0.27 |
| EKVX            | 1.12                   | 1.02 | 1   | 0.94 | 0.97 | 0.3 | 1.49                   | 1.5 | 1.43 | 1.39 | 1.26 | 0.67 |
| HOP-62          | 1.41                   | 1.38 | 1.3 | 1.18 | 0.93 | 0.3 | 1.26                   | 1.2 | 1.16 | 1.06 | 0.75 | -0.1 |
| HOP-92          | 1.31                   | 1.32 | 1.2 | 1.18 | 0.99 | 0.6 | 0.93                   | 1   | 0.87 | 0.79 | 0.71 | 0.3  |
| NCI-H226        | 1.53                   | 1.58 | 1.5 | 1.35 | 1.22 | -0  | 1.93                   | 1.9 | 1.66 | 1.42 | 1.34 | 0.36 |
| NCI-H23         | 0.75                   | 0.67 | 0.7 | 0.7  | 0.75 | 0.5 | 1.62                   | 1.6 | 1.53 | 1.34 | 1.11 | 0.2  |
| NCI-H322M       | 1.19                   | 1.29 | 1.1 | 1.03 | 0.97 | 0.5 | 1.34                   | 1.3 | 1.19 | 1.24 | 1.11 | 0.85 |
| NCI-H460        | 1.96                   | 1.92 | 1.8 | 0.99 | 0.64 | -0  | 2.39                   | 2.2 | 1.6  | 0.95 | 0.71 | 0.33 |
| NCI-H522        | 1.89                   | 1.83 | 1.7 | 1.7  | 1.59 | 0.6 | 0.76                   | 0.7 | 0.7  | 0.67 | 0.57 | 0.32 |
| COLO 205        | 1.02                   | 1.03 | 0.9 | 0.87 | 0.74 | 0.1 | 1.34                   | 1.3 | 1.27 | 1.16 | 1.1  | 0.72 |
| HCC-2998        | 1.46                   | 1.42 | 1.4 | 1.21 | 1.17 | 0.4 | 2.04                   | 1.9 | 1.93 | 1.33 | 1.6  | 0.63 |
| HCT-116         | 1.27                   | 1.21 | 1.1 | 1.05 | 0.83 | -0  | 1.08                   | 1   | 1.15 | 0.87 | 0.58 | 0.1  |
| HCT-15          | 1.63                   | 1.56 | 1.6 | 1.45 | 1.28 | 0.2 | 1.4                    | 1.4 | 1.36 | 1.2  | 1.04 | 0.3  |
| HT29            | 0.69                   | 0.63 | 0.6 | 0.59 | 0.43 | -0  | 1.14                   | 1.1 | 0.99 | 0.88 | 0.71 | 0.32 |
| KM12            | 1.72                   | 1.65 | 1.8 | 1.54 | 1.5  | 1.1 | 1.09                   | 1.1 | 1.05 | 1.03 | 0.91 | 0.33 |
| SW-620          | 0.56                   | 0.55 | 0.5 | 0.48 | 0.33 | -0  | 1.13                   | 1   | 0.98 | 0.87 | 0.6  | 0.37 |
| SF-268          | 1.22                   | 1.2  | 1.1 | 0.94 | 0.87 | 0.4 | 1.15                   | 1.1 | 1.06 | 0.87 | 0.7  | 0.34 |
| SF-295          | 2.35                   | 2.23 | 2.1 | 1.71 | 1.45 | 0.7 | 1.82                   | 1.9 | 1.63 | 1.14 | 1    | 0.51 |
| SF-539          | 1.42                   | 1.2  | 1.2 | 1.13 | 0.95 | 0.1 | 1.83                   | 1.8 | 1.87 | 1.71 | 1.19 | 0.48 |
| SNB-19          | 1.25                   | 1.24 | 1.2 | 1.02 | 0.84 | 0.5 | 1.66                   | 1.6 | 1.58 | 1.47 | 1.34 | 0.88 |
| SNB-75          | 0.96                   | 0.94 | 0.9 | 0.91 | 0.82 | 0.3 | 1.28                   | 1.2 | 1.21 | 1.04 | 0.98 | 0.54 |
| U251            | 1.53                   | 1.53 | 1.5 | 1.32 | 1.09 | 0.3 | 1.27                   | 1.3 | 1.2  | 1.09 | 0.71 | 0.02 |
| LOX IMVI        | 2.13                   | 2.1  | 1.9 | 1.75 | 1.49 | -0  | 1.62                   | 1.5 | 1.37 | 1.28 | 0.8  | 0.08 |
| MALME-3M        | 0.83                   | 0.85 | 0.8 | 0.82 | 0.8  | 0.7 | 1.04                   | 1.1 | 1.06 | 1.09 | 0.99 | 0.36 |
| M14             |                        |      |     |      |      |     | 1.24                   | 1.2 | 1.04 | 0.89 | 0.71 | 0.06 |
| MDA-MB-435      | 1.38                   | 1.33 | 1.2 | 1.15 | 1.11 | 0.2 | 1.38                   | 1.4 | 1.15 | 1.14 | 1.01 | 0.54 |
| SK-MEL-2        | 2.23                   | 2.21 | 2.2 | 2.25 | 2.19 | 1.2 | 1.93                   | 1.9 | 1.99 | 1.92 | 2.08 | 1.03 |
| SK-MEL-28       | 0.75                   | 0.72 | 0.8 | 0.75 | 0.65 | 0.3 | 1.2                    | 1.2 | 1.22 | 1.11 | 1.11 | 0.7  |
| SK-MEL-5        | 1.71                   | 1.58 | 1.3 | 0.96 | 0.8  | -0  | 1.26                   | 1   | 0.75 | 0.63 | 0.43 | 0.12 |
| UACC-257        | 1.78                   | 1.88 | 1.6 | 1.42 | 1.47 | 0.8 | 1.83                   | 1.8 | 1.5  | 1.41 | 1.33 | 0.73 |
| UACC-62         | 1.94                   | 1.98 | 1.9 | 1.79 | 1.62 | 0.3 | 2.39                   | 2.4 | 2.25 | 1.87 | 1.58 | 0.17 |
| IGROV1          | 1.47                   | 1.39 | 1.3 | 1.12 | 1.04 | 0.3 | 1.8                    | 1.6 | 1.61 | 1.37 | 1.21 | 0.15 |
| OVCAR-3         | 1.17                   | 1.1  | 1   | 1.09 | 1.04 | 0.3 | 0.97                   | 1   | 0.97 | 0.9  | 0.8  | -0   |
| OVCAR-4         | 1                      | 0.96 | 0.9 | 0.81 | 0.78 | 0.3 | 1.4                    | 1.3 | 1.21 | 1.17 | 1.06 | 0.77 |
| OVCAR-5         | 1.19                   | 1.14 | 1.1 | 0.94 | 0.82 | 0.2 | 2.13                   | 1.9 | 1.83 | 1.8  | 1.79 | 0.82 |
| OVCAR-8         | 1.63                   | 1.64 | 1.5 | 1.29 | 1.06 | 0.5 | 1.89                   | 1.9 | 1.66 | 1.4  | 1.23 | 0.54 |
| NCI/ADR-RES     | 1.62                   | 1.62 | 1.6 | 1.37 | 1.24 | 0.6 | 1.1                    | 1.1 | 0.98 | 0.89 | 0.78 | 0.62 |
| SK-OV-3         | 1.12                   | 1.12 | 1   | 0.64 | 0.57 | 0.5 | 1.09                   | 1.1 | 0.81 | 0.58 | 0.67 | 0.46 |
| 786-0           | 0.96                   | 0.73 | 0.8 | 0.56 | 0.56 | 0.2 | 2.19                   | 2.2 | 1.98 | 1.42 | 1.16 | -0   |
| A498            | 1.28                   | 1.22 | 1.1 | 0.52 | 0.14 | -0  |                        |     |      |      |      |      |
| ACHN            | 1.51                   | 1.45 | 1   | 0.57 | 0.51 | 0   | 1.29                   | 1.1 | 0.54 | 0.46 | 0.47 | 0.23 |
| CAKI-1          | 1.87                   | 1.73 | 1.6 | 1.2  | 0.81 | -0  | 0.8                    | 0.8 | 0.7  | 0.53 | 0.44 | 0    |
| RXF393          | 1.25                   | 1.23 | 1.2 | 1.08 | 1.05 | 0.4 | 1.25                   | 1.2 | 1.23 | 1.06 | 1.02 | 0.14 |
| SN12C           | 1.73                   | 1.74 | 1.6 | 1.14 | 1.08 | 0.6 | 1.77                   | 1.8 | 1.6  | 1.18 | 1.1  | 0.72 |
| TK-10           |                        |      |     |      |      |     | 1.11                   | 1.1 | 1.06 | 0.99 | 0.98 | 0.31 |
| UO-31           | 1.36                   | 1.36 | 1.1 | 0.84 | 0.79 | 0.4 | 2.17                   | 2.1 | 1.72 | 1.26 | 1.16 | 0.45 |
| PC-3            | 1.37                   | 1.41 | 1.3 | 1.16 | 1.12 | 0.4 | 0.93                   | 0.9 | 0.91 | 0.84 | 0.73 | 0.25 |
| DU-145          | 0.75                   | 0.57 | 0.5 | 0.45 | 0.35 | -0  | 1.12                   | 1.2 | 0.94 | 0.82 | 0.52 | 0.06 |
| MCF7            | 0.98                   | 0.96 | 0.9 | 0.67 | 0.59 | 0.1 | 2.04                   | 2   | 1.71 | 1.09 | 0.89 | 0.54 |
| MDA-MB-231/ATCC | 1.04                   | 1.02 | 1   | 0.96 | 0.88 | 0.3 | 1.34                   | 1.4 | 1.33 | 1.19 | 1.09 | 0.4  |
| HS 578T         | 1.16                   | 1.12 | 1.1 | 1.02 | 0.94 | 0.6 | 0.83                   | 0.8 | 0.76 | 0.77 | 0.68 | 0.43 |
| BT-549          | 0.96                   | 0.64 | 0.6 | 0.56 | 0.48 | -0  | 1.29                   | 1.3 | 1.27 | 1.09 | 1.01 | 0.5  |
| T47D            | 1.58                   | 1.53 | 1.5 | 1.28 | 1.03 | 0.8 | 1.33                   | 1.3 | 1.29 | 1.09 | 0.96 | 0.76 |

Statistical Analysis for NCI Cell Growth Data

$$\text{Full Model: } \log \text{ PPD IC}_{50} = C_1(\log \text{ Doxaz IC}_{50}) - C_2(\log \text{ CES2}) + C_3$$

| <i>Source</i>          | <i>DF</i> | <i>Sum of Squares</i> | <i>Mean Square</i> | <i>F Value</i> | <i>Pr &gt; F</i> |
|------------------------|-----------|-----------------------|--------------------|----------------|------------------|
| <i>Model</i>           | 2         | 19.17968603           | 9.58984301         | 32.38          | <.0001           |
| <i>Error</i>           | 56        | 16.58277998           | 0.29612107         |                |                  |
| <i>Corrected Total</i> | 58        | 35.76246601           |                    |                |                  |

| <i>Correlation</i>   |                  |                 |                    |
|----------------------|------------------|-----------------|--------------------|
| <i>R<sup>2</sup></i> | <i>Coeff Var</i> | <i>Root MSE</i> | <i>logPPD Mean</i> |
| 0.536308             | -11.49055        | 0.544170        | -4.735805          |

| <i>Coefficients</i> |                 |                       |                |                    |
|---------------------|-----------------|-----------------------|----------------|--------------------|
| <i>Parameter</i>    | <i>Estimate</i> | <i>Standard Error</i> | <i>t Value</i> | <i>Pr &gt;  t </i> |
| <i>Intercept</i>    | 6.587000693     | 1.42630883            | 4.62           | <.0001             |
| <i>logCES2</i>      | -3.200853137    | 0.53112232            | -6.03          | <.0001             |
| <i>logDoxaz</i>     | 0.520158073     | 0.09787031            | 5.31           | <.0001             |
